# Supplementary material for: Evolution at two time frames: Polymorphisms from an ancient singular divergence event fuel contemporary parallel evolution
Source: PubMed Central journal article supplement (PMC6258555; doi:10.1371/journal.pgen.1007796), 2018-11-13
Supplement: pgen.1007796.s003.pdf [file pgen.1007796.s003.pdf]

|            | $\pi$ (SD)        | Fst           |               |               |               |               |               |               |               |        |        |
|------------|-------------------|---------------|---------------|---------------|---------------|---------------|---------------|---------------|---------------|--------|--------|
|            |                   | BeL           | BeS           | FrL           | FrS           | PoL           | PoS           | SpL           | SpS           | MeL    | UKS    |
| <b>BeL</b> | 0.00408 (0.00529) | -             | <b>0.0652</b> | 0.1079        | 0.1522        | 0.2675        | 0.3041        | 0.2113        | 0.2399        | 0.1676 | 0.0793 |
| <b>BeS</b> | 0.00391 (0.00482) | <b>0.0918</b> | -             | 0.0970        | 0.0824        | 0.2680        | 0.2501        | 0.2072        | 0.1961        | 0.1798 | 0.0480 |
| <b>FrL</b> | 0.00400 (0.00504) | 0.1142        | 0.1132        | -             | <b>0.0904</b> | 0.2661        | 0.2980        | 0.1968        | 0.2262        | 0.1619 | 0.0862 |
| <b>FrS</b> | 0.00295 (0.00432) | 0.2022        | 0.0903        | <b>0.1358</b> | -             | 0.3015        | 0.2638        | 0.2486        | 0.2168        | 0.2327 | 0.0950 |
| <b>PoL</b> | 0.00360 (0.00523) | 0.2497        | 0.2611        | 0.2456        | 0.3203        | -             | <b>0.1103</b> | 0.1666        | 0.2250        | 0.2424 | 0.2400 |
| <b>PoS</b> | 0.00461 (0.00490) | 0.3166        | 0.2411        | 0.3007        | 0.2558        | <b>0.1552</b> | -             | 0.2650        | 0.2020        | 0.3187 | 0.2550 |
| <b>SpL</b> | 0.00440 (0.00564) | 0.2263        | 0.2536        | 0.2220        | 0.3300        | 0.1681        | 0.3277        | -             | <b>0.1659</b> | 0.1220 | 0.1568 |
| <b>SpS</b> | 0.00499 (0.00536) | 0.2698        | 0.1920        | 0.2440        | 0.1999        | 0.2566        | 0.1955        | <b>0.2700</b> | -             | 0.2392 | 0.1864 |
| <b>MeL</b> | 0.00532 (0.00547) | 0.1778        | 0.2381        | 0.1912        | 0.3277        | 0.2401        | 0.3716        | 0.1349        | 0.3295        | -      | 0.1000 |
| <b>UKS</b> | 0.00386 (0.00498) | 0.0956        | 0.0521        | 0.0919        | 0.1218        | 0.2221        | 0.2507        | 0.1945        | 0.1968        | 0.1547 | -      |
