# Supplementary material for: Evolution at two time frames: Polymorphisms from an ancient singular divergence event fuel contemporary parallel evolution
Source: PubMed Central journal article supplement (PMC6258555; doi:10.1371/journal.pgen.1007796), 2018-11-13
Supplement: pgen.1007796.s004.pdf [file pgen.1007796.s004.pdf]

| Population pair<br>model      | Among ecotypes        |                       |                       |                       | Within ecotypes               |                       |                        |
|-------------------------------|-----------------------|-----------------------|-----------------------|-----------------------|-------------------------------|-----------------------|------------------------|
|                               | <i>Be</i><br>SC2M_hrf | <i>Fr</i><br>SC2M_hrf | <i>Po</i><br>SC2M_hrf | <i>Sp</i><br>SC2M_hrf | Population pair<br>model      | <i>Long</i><br>SC_hrf | <i>Short</i><br>SC_hrf |
| <i>v</i> (L)                  | [0.043-0.061]         | [0.293-0.448]         | [0.535-1.069]         | [0.347-0.864]         | <i>v</i> (Be)                 | [0.065-0.113]         | [0.08-0.234]           |
| <i>v</i> (S)                  | [0.199-0.28]          | [0.111-0.138]         | [0.007-0.014]         | [0.01-0.014]          | <i>v</i> (Fr)                 | [0.167-0.299]         | [0.162-0.286]          |
| <i>hrf</i>                    | [0.21-0.52]           | [0.06-0.34]           | [0.07-0.27]           | [0.03-0.44]           | <i>hrf</i>                    | [0.14-0.51]           | [0.15-0.32]            |
| <i>M</i> (L<-S)*              | [134.8-155.1]         | [7.4-15.8]            | [65.2-95.9]           | [43.2-93.7]           | <i>M</i> (Be<-Fr)*            | [35.3-57.2]           | [39.7-72.6]            |
| <i>M</i> (S<-L)*              | [12.1-16]             | [79.4-125.5]          | [381.2-656.3]         | [350.3-985.2]         | <i>M</i> (Fr<-Be)*            | [5-6.7]               | [5.1-7.4]              |
| <i>M</i> (I)(L<-S)*           | [24.7-29.4]           | [3.9-5.7]             | [0.5-4.4]             | [0.4-0.8]             | <i>M</i> (I)(Be<-Fr)*         | -                     | -                      |
| <i>M</i> (I)(S<-L)*           | [15-20]               | [2.1-3.1]             | [7.8-18.5]            | [8.3-10.9]            | <i>M</i> (I)(Fr<-Be)*         | -                     | -                      |
| <i>t<sub>s</sub></i> *        | [0.26-0.3]            | [0.46-2.07]           | [0.5-0.54]            | [0.44-1.17]           | <i>t<sub>s</sub></i> *        | [0.2-0.8]             | [0.38-0.98]            |
| <i>t<sub>sc</sub></i> *       | [0.016-0.02]          | [0.063-0.135]         | [0.014-0.037]         | [0.011-0.023]         | <i>t<sub>sc</sub></i> *       | [0.035-0.078]         | [0.037-0.072]          |
| <i>Q</i>                      | [0.15-0.45]           | [0.09-0.22]           | [0.34-0.95]           | [0.59-0.92]           | <i>Q</i>                      | [0.24-0.9]            | [0.1-0.53]             |
| <i>P</i>                      | [0.24-0.37]           | [0.29-0.45]           | [0.17-0.47]           | [0.14-0.43]           | <i>P</i>                      | -                     | -                      |
| <i>θ</i> (L)                  | [60.9-78.7]           | [362.3-428.2]         | [566.2-858.9]         | [435.5-707.9]         | <i>θ</i> (Be)                 | [114.6-150.6]         | [132.4-273.1]          |
| <i>θ</i> (S)                  | [287.9-350.5]         | [119.9-145.6]         | [5-12.4]              | [8.2-17.8]            | <i>θ</i> (Fr)                 | [292-373.6]           | [256.3-344.2]          |
| <i>θ</i> (A)                  | [1250.9-1444.8]       | [881.5-1262]          | [731.2-1127.3]        | [681.4-1314.3]        | <i>θ</i> (A)                  | [1105-1752.5]         | [1167.3-1810.3]        |
| <i>N</i> (L)                  | [3541-4578]           | [23157-27369]         | [38257-58031]         | [31039-50451]         | <i>N</i> (Be)                 | [7420-9754]           | [8423-17367]           |
| <i>N</i> (S)                  | [16750-20398]         | [7661-9304]           | [341-836]             | [585-1268]            | <i>N</i> (Fr)                 | [18907-24190]         | [16301-21895]          |
| <i>N</i> (A)                  | [72790-84071]         | [56341-80661]         | [49402-76164]         | [48563-93674]         | <i>N</i> (A)                  | [71553-113478]        | [74241-115143]         |
| <i>T<sub>s</sub></i> (years)  | [41043.1-45020.8]     | [61347.1-233766.1]    | [49754-76925.9]       | [57830.5-136677]      | <i>T<sub>s</sub></i> (years)  | [34397.6-182042]      | [56994.7-147984.7]     |
| <i>T<sub>sc</sub></i> (years) | [1296.6-1786.1]       | [7773.7-63327.3]      | [2099.9-3643.9]       | [1381.4-5330.8]       | <i>T<sub>sc</sub></i> (years) | [2824-26616.7]        | [4227.6-21322.1]       |
| <i>m</i> (L<-S) (x1000)       | [0.82-1]              | [0.07-0.13]           | [0.51-0.88]           | [0.23-0.96]           | <i>m</i> (Be<-Fr) (x1000)     | [0.2-0.35]            | [0.26-0.36]            |
| <i>m</i> (S<-L) (x1000)       | [0.08-0.1]            | [0.7-1.03]            | [2.66-5.24]           | [1.87-10.14]          | <i>m</i> (Fr<-Be) (x1000)     | [0.02-0.04]           | [0.03-0.04]            |
| <i>m</i> (I)(L<-S) (x1000)    | [0.15-0.18]           | [0.03-0.04]           | [0-0.04]              | [0-0.01]              | <i>m</i> (I)(Be<-Fr) (x1000)  | -                     | -                      |
| <i>m</i> (I)(S<-L) (x1000)    | [0.09-0.13]           | [0.02-0.03]           | [0.05-0.19]           | [0.05-0.11]           | <i>m</i> (I)(Fr<-Be) (x1000)  | -                     | -                      |
| <i>M</i> (L<-S)               | [2.97-4.21]           | [1.55-3.54]           | [19.65-44.42]         | [7.5-38.35]           | <i>M</i> (Be<-Fr)             | [1.76-2.78]           | [2.87-6.26]            |
| <i>M</i> (S<-L)               | [1.41-1.99]           | [5.4-8.65]            | [1.54-3.07]           | [2.37-5.93]           | <i>M</i> (Fr<-Be)             | [0.44-0.83]           | [0.49-0.74]            |
| <i>M</i> (I)(L<-S)            | [0.53-0.77]           | [0.81-1.18]           | [0.14-2.02]           | [0.09-0.26]           | <i>M</i> (I)(Be<-Fr)          | -                     | -                      |
| <i>M</i> (I)(S<-L)            | [1.5-2.48]            | [0.15-0.22]           | [0.03-0.08]           | [0.06-0.07]           | <i>M</i> (I)(Fr<-Be)          | -                     | -                      |
