# Supplementary material for: Evolution at two time frames: Polymorphisms from an ancient singular divergence event fuel contemporary parallel evolution
Source: PubMed Central journal article supplement (PMC6258555; doi:10.1371/journal.pgen.1007796), 2018-11-13
Supplement: pgen.1007796.s005.pdf [file pgen.1007796.s005.pdf]

| Sample ID | Taxon                   | Locality         | Sex | Habitat  | EL    | EW    | WL    | WW    | Accession    |
|-----------|-------------------------|------------------|-----|----------|-------|-------|-------|-------|--------------|
| GC3b_071  | <i>Pogonus chalceus</i> | France: Guérande | M   | tidal    | 3.465 | 1.250 | 2.880 | 1.425 | SAMN06691389 |
| GC3b_072  | <i>Pogonus chalceus</i> | France: Guérande | M   | tidal    | 3.402 | 1.175 | 3.000 | 1.225 | SAMN06691390 |
| GC3b_073  | <i>Pogonus chalceus</i> | France: Guérande | M   | tidal    | 3.339 | 1.150 | 2.840 | 1.375 | SAMN06691391 |
| GC3b_074  | <i>Pogonus chalceus</i> | France: Guérande | M   | tidal    | 3.465 | 1.200 | 3.000 | 1.450 | SAMN06691392 |
| GC3b_075  | <i>Pogonus chalceus</i> | France: Guérande | M   | tidal    | 3.150 | 1.075 | 2.640 | 1.250 | SAMN06691393 |
| GC3b_076  | <i>Pogonus chalceus</i> | France: Guérande | M   | tidal    | 3.497 | 1.125 | 2.960 | 1.425 | SAMN06691394 |
| GC3b_077  | <i>Pogonus chalceus</i> | France: Guérande | M   | tidal    | 3.276 | 1.125 | 2.720 | 1.250 | SAMN06691395 |
| GC3b_078  | <i>Pogonus chalceus</i> | France: Guérande | M   | tidal    | 3.402 | 1.238 | 3.000 | 1.375 | SAMN06691396 |
| GC3b_079  | <i>Pogonus chalceus</i> | France: Guérande | M   | tidal    | 3.528 | 1.175 | 2.880 | 1.375 | SAMN06691397 |
| GC3b_080  | <i>Pogonus chalceus</i> | France: Guérande | M   | tidal    | 3.276 | 1.150 | 2.600 | 1.400 | SAMN06691398 |
| GC3b_081  | <i>Pogonus chalceus</i> | France: Guérande | M   | tidal    | 3.339 | 1.100 | 2.880 | 1.350 | SAMN06691399 |
| GC3b_082  | <i>Pogonus chalceus</i> | France: Guérande | M   | tidal    | 3.465 | 1.150 | 3.000 | 1.350 | SAMN06691400 |
| GC3b_083  | <i>Pogonus chalceus</i> | France: Guérande | M   | tidal    | 3.213 | 1.075 | 2.600 | 1.250 | SAMN06691401 |
| GC3b_084  | <i>Pogonus chalceus</i> | France: Guérande | M   | tidal    | 3.339 | 1.150 | 3.000 | 1.425 | SAMN06691402 |
| GC3b_085  | <i>Pogonus chalceus</i> | France: Guérande | M   | tidal    | 3.402 | 1.175 | 2.880 | 1.450 | SAMN06691403 |
| GC3b_086  | <i>Pogonus chalceus</i> | France: Guérande | M   | tidal    | 3.024 | 1.000 | 2.840 | 1.050 | SAMN06691404 |
| GC3b_087  | <i>Pogonus chalceus</i> | France: Guérande | M   | tidal    | 3.528 | 1.175 | 2.800 | 1.300 | SAMN06691405 |
| GC3b_088  | <i>Pogonus chalceus</i> | France: Guérande | M   | tidal    | 3.591 | 1.275 | 3.080 | 1.350 | SAMN06691406 |
| GC3b_089  | <i>Pogonus chalceus</i> | France: Guérande | M   | tidal    | 3.402 | 1.150 | 3.120 | 1.300 | SAMN06691407 |
| GC3b_090  | <i>Pogonus chalceus</i> | France: Guérande | M   | tidal    | 3.339 | 1.175 | 2.520 | 1.300 | SAMN06691408 |
| GC3b_091  | <i>Pogonus chalceus</i> | France: Guérande | M   | tidal    | 3.497 | 1.200 | 2.920 | 1.425 | SAMN06691409 |
| GC3b_092  | <i>Pogonus chalceus</i> | France: Guérande | M   | tidal    | 3.623 | 1.175 | 2.920 | 1.400 | SAMN06691410 |
| GC3b_093  | <i>Pogonus chalceus</i> | France: Guérande | M   | tidal    | NA    | NA    | NA    | NA    | SAMN06691411 |
| GC3b_098  | <i>Pogonus chalceus</i> | France: Guérande | M   | tidal    | 3.402 | 1.125 | 2.680 | 1.225 | SAMN06691412 |
| Da_022    | <i>Pogonus chalceus</i> | Belgium: Dudzele | M   | seasonal | 4.064 | 1.450 | 6.111 | 2.525 | SAMN06691413 |
| Da_029    | <i>Pogonus chalceus</i> | Belgium: Dudzele | M   | seasonal | 3.591 | 1.250 | 5.355 | 2.225 | SAMN06691414 |
| Db_094    | <i>Pogonus chalceus</i> | Belgium: Dudzele | M   | seasonal | 3.591 | 1.250 | 5.607 | 2.225 | SAMN06691415 |
| Db_098    | <i>Pogonus chalceus</i> | Belgium: Dudzele | M   | seasonal | 3.591 | 1.325 | 5.355 | 2.225 | SAMN06691416 |
| Db_100    | <i>Pogonus chalceus</i> | Belgium: Dudzele | M   | seasonal | 4.127 | 1.400 | 6.174 | 2.475 | SAMN06691417 |
| Db_101    | <i>Pogonus chalceus</i> | Belgium: Dudzele | M   | seasonal | 3.875 | 1.313 | 5.607 | 2.200 | SAMN06691418 |
| Db_102    | <i>Pogonus chalceus</i> | Belgium: Dudzele | M   | seasonal | 3.969 | 1.375 | 5.985 | 2.325 | SAMN06691419 |
| Db_103    | <i>Pogonus chalceus</i> | Belgium: Dudzele | M   | seasonal | 3.591 | 1.300 | 5.292 | 2.225 | SAMN06691420 |
| Pc_DZ_001 | <i>Pogonus chalceus</i> | Belgium: Dudzele | M   | seasonal | 4.032 | 1.350 | 6.174 | 2.500 | SAMN06691421 |
| Pc_DZ_002 | <i>Pogonus chalceus</i> | Belgium: Dudzele | M   | seasonal | 3.717 | 1.250 | 5.733 | 2.200 | SAMN06691422 |
| Pc_DZ_004 | <i>Pogonus chalceus</i> | Belgium: Dudzele | M   | seasonal | 3.969 | 1.350 | 5.733 | 2.225 | SAMN06691423 |
| Pc_DZ_005 | <i>Pogonus chalceus</i> | Belgium: Dudzele | M   | seasonal | 4.001 | 1.325 | 6.143 | 2.400 | SAMN06691424 |
| Pc_DZ_007 | <i>Pogonus chalceus</i> | Belgium: Dudzele | M   | seasonal | 4.095 | 1.375 | 6.111 | 2.450 | SAMN06691425 |
| Pc_DZ_008 | <i>Pogonus chalceus</i> | Belgium: Dudzele | M   | seasonal | 3.843 | 1.350 | 5.733 | 2.325 | SAMN06691426 |
| Pc_DZ_009 | <i>Pogonus chalceus</i> | Belgium: Dudzele | M   | seasonal | 4.064 | 1.400 | 6.269 | 2.650 | SAMN06691427 |
| Pc_DZ_011 | <i>Pogonus chalceus</i> | Belgium: Dudzele | M   | seasonal | 3.780 | 1.325 | 5.922 | 2.250 | SAMN06691428 |
| Pc_DZ_012 | <i>Pogonus chalceus</i> | Belgium: Dudzele | M   | seasonal | 3.812 | 1.350 | 5.796 | 2.375 | SAMN06691429 |
| Pc_DZ_013 | <i>Pogonus chalceus</i> | Belgium: Dudzele | M   | seasonal | 3.875 | 1.350 | 5.922 | 2.375 | SAMN06691430 |

|           |                         |                     |   |          |       |       |       |       |              |
|-----------|-------------------------|---------------------|---|----------|-------|-------|-------|-------|--------------|
| Pc_DZ_016 | <i>Pogonus chalceus</i> | Belgium: Dudzele    | M | seasonal | 4.127 | 1.425 | 6.363 | 2.563 | SAMN06691431 |
| Pc_DZ_018 | <i>Pogonus chalceus</i> | Belgium: Dudzele    | M | seasonal | 3.969 | 1.375 | 5.733 | 2.275 | SAMN06691432 |
| Pc_DZ_022 | <i>Pogonus chalceus</i> | Belgium: Dudzele    | M | seasonal | 4.032 | 1.300 | 6.174 | 2.400 | SAMN06691433 |
| Pc_DZ_024 | <i>Pogonus chalceus</i> | Belgium: Dudzele    | M | seasonal | 4.032 | 1.450 | 5.670 | 2.250 | SAMN06691434 |
| Pc_DZ_027 | <i>Pogonus chalceus</i> | Belgium: Dudzele    | M | seasonal | 4.127 | 1.425 | 6.426 | 2.575 | SAMN06691435 |
| Pc_DZ_030 | <i>Pogonus chalceus</i> | Belgium: Dudzele    | M | seasonal | 4.127 | 1.425 | 6.426 | 2.550 | SAMN06691436 |
| Na_034    | <i>Pogonus chalceus</i> | Belgium: Nieuwpoort | M | tidal    | 3.528 | 1.300 | 3.200 | 1.575 | SAMN06691437 |
| Nb_002    | <i>Pogonus chalceus</i> | Belgium: Nieuwpoort | M | tidal    | 3.465 | 1.250 | 3.320 | 1.425 | SAMN06691438 |
| Nb_006    | <i>Pogonus chalceus</i> | Belgium: Nieuwpoort | M | tidal    | 3.434 | 1.200 | 3.900 | 1.375 | SAMN06691439 |
| Nb_007    | <i>Pogonus chalceus</i> | Belgium: Nieuwpoort | M | tidal    | 3.434 | 1.150 | 2.960 | 1.425 | SAMN06691440 |
| Nb_015    | <i>Pogonus chalceus</i> | Belgium: Nieuwpoort | M | tidal    | 3.402 | 1.125 | 4.200 | 1.650 | SAMN06691441 |
| Nb_019    | <i>Pogonus chalceus</i> | Belgium: Nieuwpoort | M | tidal    | 3.654 | 1.250 | 3.520 | 1.750 | SAMN06691442 |
| Nb_025    | <i>Pogonus chalceus</i> | Belgium: Nieuwpoort | M | tidal    | 3.276 | 1.150 | 3.640 | 1.525 | SAMN06691443 |
| Nb_031    | <i>Pogonus chalceus</i> | Belgium: Nieuwpoort | M | tidal    | 3.528 | 1.200 | 4.473 | 1.800 | SAMN06691444 |
| Nb_033    | <i>Pogonus chalceus</i> | Belgium: Nieuwpoort | M | tidal    | 3.434 | 1.188 | 3.520 | 1.400 | SAMN06691445 |
| Nb_038    | <i>Pogonus chalceus</i> | Belgium: Nieuwpoort | M | tidal    | 3.465 | 1.200 | 3.240 | 1.413 | SAMN06691446 |
| Nb_062    | <i>Pogonus chalceus</i> | Belgium: Nieuwpoort | M | tidal    | 3.276 | 1.175 | 3.920 | 1.325 | SAMN06691447 |
| Nb_095    | <i>Pogonus chalceus</i> | Belgium: Nieuwpoort | M | tidal    | 3.875 | 1.413 | 3.280 | 1.600 | SAMN06691448 |
| PcNP_033  | <i>Pogonus chalceus</i> | Belgium: Nieuwpoort | M | tidal    | 3.402 | 1.200 | 3.440 | 1.650 | SAMN06691449 |
| PcNP_034  | <i>Pogonus chalceus</i> | Belgium: Nieuwpoort | M | tidal    | 3.434 | 1.200 | 3.320 | 1.675 | SAMN06691450 |
| PcNP_035  | <i>Pogonus chalceus</i> | Belgium: Nieuwpoort | M | tidal    | 3.213 | 1.100 | 3.000 | 1.425 | SAMN06691451 |
| PcNP_036  | <i>Pogonus chalceus</i> | Belgium: Nieuwpoort | M | tidal    | 3.465 | 1.175 | 3.560 | 1.650 | SAMN06691452 |
| PcNP_037  | <i>Pogonus chalceus</i> | Belgium: Nieuwpoort | M | tidal    | 3.528 | 1.213 | 3.360 | 1.500 | SAMN06691453 |
| PcNP_038  | <i>Pogonus chalceus</i> | Belgium: Nieuwpoort | M | tidal    | 3.465 | 1.200 | 3.200 | 1.500 | SAMN06691454 |
| PcNP_040  | <i>Pogonus chalceus</i> | Belgium: Nieuwpoort | M | tidal    | 3.213 | 1.125 | 2.940 | 1.400 | SAMN06691455 |
| PcNP_041  | <i>Pogonus chalceus</i> | Belgium: Nieuwpoort | M | tidal    | 3.245 | 1.100 | 3.020 | 1.513 | SAMN06691456 |
| PcNP_043  | <i>Pogonus chalceus</i> | Belgium: Nieuwpoort | M | tidal    | 3.528 | 1.200 | 3.400 | 1.550 | SAMN06691457 |
| PcNP_044  | <i>Pogonus chalceus</i> | Belgium: Nieuwpoort | M | tidal    | 3.591 | 1.200 | 3.960 | 1.675 | SAMN06691458 |
| PcNP_045  | <i>Pogonus chalceus</i> | Belgium: Nieuwpoort | M | tidal    | 3.528 | 1.188 | 2.960 | 1.500 | SAMN06691459 |
| PcNP_046  | <i>Pogonus chalceus</i> | Belgium: Nieuwpoort | M | tidal    | 3.560 | 1.213 | 3.200 | 1.700 | SAMN06691460 |
| GP3_055   | <i>Pogonus chalceus</i> | France: Guérande    | M | seasonal | 3.969 | 1.375 | 5.796 | 2.425 | SAMN06691461 |
| GP3_059   | <i>Pogonus chalceus</i> | France: Guérande    | M | seasonal | 3.906 | 1.375 | 5.670 | 2.325 | SAMN06691462 |
| GP3_067   | <i>Pogonus chalceus</i> | France: Guérande    | M | seasonal | 3.875 | 1.388 | 5.355 | 2.125 | SAMN06691463 |
| GP3_068   | <i>Pogonus chalceus</i> | France: Guérande    | M | seasonal | 3.906 | 1.350 | 5.607 | 2.200 | SAMN06691464 |
| GP3_078   | <i>Pogonus chalceus</i> | France: Guérande    | M | seasonal | NA    | NA    | NA    | NA    | SAMN06691465 |
| GP3_088   | <i>Pogonus chalceus</i> | France: Guérande    | M | seasonal | 3.717 | 1.300 | 5.544 | 2.200 | SAMN06691466 |
| GP3b_047  | <i>Pogonus chalceus</i> | France: Guérande    | M | seasonal | 3.843 | 1.300 | 5.166 | 2.075 | SAMN06691467 |
| GP3b_048  | <i>Pogonus chalceus</i> | France: Guérande    | M | seasonal | 4.284 | 1.425 | 5.733 | 2.200 | SAMN06691468 |
| GP3b_055  | <i>Pogonus chalceus</i> | France: Guérande    | M | seasonal | 4.158 | 1.450 | 5.670 | 2.250 | SAMN06691469 |
| GP3b_056  | <i>Pogonus chalceus</i> | France: Guérande    | M | seasonal | 4.001 | 1.400 | 5.229 | 2.150 | SAMN06691470 |
| GP3b_057  | <i>Pogonus chalceus</i> | France: Guérande    | M | seasonal | 4.032 | 1.375 | 5.733 | 2.275 | SAMN06691471 |
| GP3b_062  | <i>Pogonus chalceus</i> | France: Guérande    | M | seasonal | 3.969 | 1.325 | 4.473 | 2.250 | SAMN06691472 |
| GP3b_063  | <i>Pogonus chalceus</i> | France: Guérande    | M | seasonal | 3.969 | 1.463 | 4.977 | 1.975 | SAMN06691473 |

|           |                         |                   |   |          |        |       |       |       |              |
|-----------|-------------------------|-------------------|---|----------|--------|-------|-------|-------|--------------|
| GP3b_064  | <i>Pogonus chalceus</i> | France: Guérande  | M | seasonal | 4.095  | 1.450 | 5.922 | 2.150 | SAMN06691474 |
| GP3b_066  | <i>Pogonus chalceus</i> | France: Guérande  | M | seasonal | 3.938  | 1.350 | 5.481 | 2.100 | SAMN06691475 |
| GP3b_067  | <i>Pogonus chalceus</i> | France: Guérande  | M | seasonal | 4.158  | 1.450 | 5.796 | 2.300 | SAMN06691476 |
| GP3b_068  | <i>Pogonus chalceus</i> | France: Guérande  | M | seasonal | 3.843  | 1.375 | 5.355 | 2.150 | SAMN06691477 |
| GP3b_069  | <i>Pogonus chalceus</i> | France: Guérande  | M | seasonal | 3.906  | 1.350 | 5.292 | 2.150 | SAMN06691478 |
| GP3b_076  | <i>Pogonus chalceus</i> | France: Guérande  | M | seasonal | 3.906  | 1.35  | 5.481 | 2.25  | SAMN06691479 |
| GP3b_077  | <i>Pogonus chalceus</i> | France: Guérande  | M | seasonal | 4.1895 | 1.4   | 5.607 | 2.275 | SAMN06691480 |
| GP3b_080  | <i>Pogonus chalceus</i> | France: Guérande  | M | seasonal | 4.158  | 1.5   | 6.111 | 2.25  | SAMN06691481 |
| GP3b_082  | <i>Pogonus chalceus</i> | France: Guérande  | M | seasonal | 4.158  | 1.425 | 5.481 | 2.425 | SAMN06691482 |
| GP3b_084  | <i>Pogonus chalceus</i> | France: Guérande  | M | seasonal | 4.095  | 1.413 | 5.481 | 2.250 | SAMN06691483 |
| GP3b_085  | <i>Pogonus chalceus</i> | France: Guérande  | M | seasonal | 4.127  | 1.375 | 6.174 | 2.325 | SAMN06691484 |
| PcAVE_003 | <i>Pogonus chalceus</i> | Portugal: Aveiro  | M | seasonal | 3.812  | 1.250 | 5.670 | 2.350 | SAMN06691485 |
| PcAVE_004 | <i>Pogonus chalceus</i> | Portugal: Aveiro  | M | seasonal | 3.528  | 1.250 | 5.670 | 2.225 | SAMN06691486 |
| PcAVE_005 | <i>Pogonus chalceus</i> | Portugal: Aveiro  | M | seasonal | 3.623  | 1.275 | 5.670 | 2.250 | SAMN06691487 |
| PcAVE_006 | <i>Pogonus chalceus</i> | Portugal: Aveiro  | M | seasonal | 3.969  | 1.325 | 6.237 | 2.475 | SAMN06691488 |
| PcAVE_018 | <i>Pogonus chalceus</i> | Portugal: Aveiro  | F | seasonal | 4.064  | 1.400 | 6.237 | 2.500 | SAMN06691489 |
| PcAVE_019 | <i>Pogonus chalceus</i> | Portugal: Aveiro  | F | seasonal | 4.347  | 1.500 | 6.867 | 2.650 | SAMN06691490 |
| PcAVE_025 | <i>Pogonus chalceus</i> | Portugal: Aveiro  | F | seasonal | 4.158  | 1.400 | 6.395 | 2.475 | SAMN06691491 |
| PcAVE_026 | <i>Pogonus chalceus</i> | Portugal: Aveiro  | F | seasonal | 4.095  | 1.375 | 6.111 | 2.475 | SAMN06691492 |
| PcAVE_031 | <i>Pogonus chalceus</i> | Portugal: Aveiro  | M | tidal    | 3.213  | 1.025 | 3.280 | 1.475 | SAMN06691493 |
| PcAVE_032 | <i>Pogonus chalceus</i> | Portugal: Aveiro  | M | tidal    | 3.528  | 1.150 | 3.200 | 1.675 | SAMN06691494 |
| PcAVE_033 | <i>Pogonus chalceus</i> | Portugal: Aveiro  | M | tidal    | 3.245  | 1.100 | 3.280 | 1.475 | SAMN06691495 |
| PcAVE_034 | <i>Pogonus chalceus</i> | Portugal: Aveiro  | M | tidal    | 3.150  | 1.075 | 3.120 | 1.300 | SAMN06691496 |
| PcAVE_035 | <i>Pogonus chalceus</i> | Portugal: Aveiro  | F | tidal    | 3.717  | 1.225 | 3.640 | 1.525 | SAMN06691497 |
| PcAVE_036 | <i>Pogonus chalceus</i> | Portugal: Aveiro  | F | tidal    | 3.938  | 1.275 | 3.640 | 1.775 | SAMN06691498 |
| PcAVE_037 | <i>Pogonus chalceus</i> | Portugal: Aveiro  | F | tidal    | 3.308  | 1.100 | 3.280 | 1.525 | SAMN06691499 |
| PcAVE_038 | <i>Pogonus chalceus</i> | Portugal: Aveiro  | F | tidal    | 3.875  | 1.338 | 3.520 | 1.675 | SAMN06691500 |
| Pc277     | <i>Pogonus chalceus</i> | France: Camargue  | M | seasonal | 3.640  | 1.100 | 5.750 | 2.280 | SAMN06691501 |
| Pc297     | <i>Pogonus chalceus</i> | France: Camargue  | F | seasonal | 4.040  | 1.220 | 6.167 | 2.400 | SAMN06691502 |
| Pc298     | <i>Pogonus chalceus</i> | France: Camargue  | M | seasonal | 4.040  | 1.280 | 6.083 | 2.480 | SAMN06691503 |
| Pc299     | <i>Pogonus chalceus</i> | France: Camargue  | F | seasonal | 4.680  | 1.440 | 7.250 | 2.800 | SAMN06691504 |
| Pc300     | <i>Pogonus chalceus</i> | France: Camargue  | M | seasonal | 3.680  | 1.160 | 5.833 | 2.160 | SAMN06691505 |
| Pc316     | <i>Pogonus chalceus</i> | France: Camargue  | F | seasonal | 3.840  | 1.200 | 5.917 | 2.080 | SAMN06691506 |
| Pc317     | <i>Pogonus chalceus</i> | France: Camargue  | F | seasonal | 4.120  | 1.280 | 6.250 | 2.400 | SAMN06691507 |
| Pc318     | <i>Pogonus chalceus</i> | France: Camargue  | M | seasonal | 3.480  | 1.060 | 5.333 | 1.960 | SAMN06691508 |
| Pc786     | <i>Pogonus chalceus</i> | UK: SevernEstuary | F | tidal    | 4.120  | 1.300 | 4.167 | 1.800 | SAMN06691509 |
| Pc787     | <i>Pogonus chalceus</i> | UK: SevernEstuary | M | tidal    | NA     | NA    | NA    | NA    | SAMN06691510 |
| Pc788     | <i>Pogonus chalceus</i> | UK: SevernEstuary | M | tidal    | NA     | NA    | NA    | NA    | SAMN06691511 |
| Pc801     | <i>Pogonus chalceus</i> | UK: SevernEstuary | M | tidal    | NA     | NA    | NA    | NA    | SAMN06691512 |
| Pc805     | <i>Pogonus chalceus</i> | UK: SevernEstuary | M | tidal    | NA     | NA    | NA    | NA    | SAMN06691513 |
| Pc821     | <i>Pogonus chalceus</i> | UK: SevernEstuary | F | tidal    | NA     | NA    | NA    | NA    | SAMN06691514 |
| Pc822     | <i>Pogonus chalceus</i> | UK: SevernEstuary | M | tidal    | NA     | NA    | NA    | NA    | SAMN06691515 |
| Pc823     | <i>Pogonus chalceus</i> | UK: SevernEstuary | M | tidal    | NA     | NA    | NA    | NA    | SAMN06691516 |

|        |                           |                      |   |             |       |       |       |       |              |
|--------|---------------------------|----------------------|---|-------------|-------|-------|-------|-------|--------------|
| Pc2311 | <i>Pogonus chalceus</i>   | Spain: CotoDonana    | M | seasonal    | NA    | NA    | NA    | NA    | SAMN06691517 |
| Pc2314 | <i>Pogonus chalceus</i>   | Spain: CotoDonana    | M | seasonal    | 4.520 | 1.400 | 7.083 | 2.720 | SAMN06691518 |
| Pc2316 | <i>Pogonus chalceus</i>   | Spain: Huelva        | M | tidal       | 3.560 | 1.080 | 2.667 | 1.200 | SAMN06691519 |
| Pc2317 | <i>Pogonus chalceus</i>   | Spain: Huelva        | F | tidal       | 3.920 | 1.220 | 2.917 | 1.440 | SAMN06691520 |
| Pc2318 | <i>Pogonus chalceus</i>   | Spain: Huelva        | F | tidal       | 4.200 | 1.320 | 2.917 | 1.560 | SAMN06691521 |
| Pc2321 | <i>Pogonus chalceus</i>   | Spain: CotoDonana    | F | seasonal    | 4.320 | 1.360 | 6.833 | 2.640 | SAMN06691522 |
| Pc2323 | <i>Pogonus chalceus</i>   | Spain: CotoDonana    | F | seasonal    | 4.560 | 1.420 | 7.167 | 2.760 | SAMN06691523 |
| Pc2324 | <i>Pogonus chalceus</i>   | Spain: CotoDonana    | M | seasonal    | 4.200 | 1.300 | 6.500 | 2.600 | SAMN06691524 |
| Pc2325 | <i>Pogonus chalceus</i>   | Spain: CotoDonana    | F | seasonal    | 4.280 | 1.340 | 6.750 | 2.600 | SAMN06691525 |
| Pc2331 | <i>Pogonus chalceus</i>   | Spain: CotoDonana    | F | seasonal    | 4.320 | 1.360 | 6.250 | 2.520 | SAMN06691526 |
| Pc2332 | <i>Pogonus chalceus</i>   | Spain: CotoDonana    | F | seasonal    | 4.720 | 1.520 | 7.333 | 2.920 | SAMN06691527 |
| Pc2336 | <i>Pogonus chalceus</i>   | Spain: Huelva        | F | tidal       | 4.400 | 1.360 | 3.000 | 1.560 | SAMN06691528 |
| Pc2337 | <i>Pogonus chalceus</i>   | Spain: Huelva        | F | tidal       | 4.000 | 1.240 | 3.083 | 1.480 | SAMN06691529 |
| Pc2338 | <i>Pogonus chalceus</i>   | Spain: Huelva        | F | tidal       | 3.920 | 1.200 | 2.583 | 1.240 | SAMN06691530 |
| Pc2339 | <i>Pogonus chalceus</i>   | Spain: Huelva        | M | tidal       | 3.240 | 1.000 | 2.417 | 0.960 | SAMN06691531 |
| Pc2340 | <i>Pogonus chalceus</i>   | Spain: Huelva        | M | tidal       | 3.520 | 1.120 | 2.583 | 1.200 | SAMN06691532 |
| pl706  | <i>Pogonus littoralis</i> | Greece: Thessaloniki | F | Axion Delta | NA    | NA    | NA    | NA    | SAMN06691533 |
| pl707  | <i>Pogonus littoralis</i> | Greece: Thessaloniki | F | Axion Delta | NA    | NA    | NA    | NA    | SAMN06691534 |
