# Supplementary material for: Evolution at two time frames: Polymorphisms from an ancient singular divergence event fuel contemporary parallel evolution
Source: PubMed Central journal article supplement (PMC6258555; doi:10.1371/journal.pgen.1007796), 2018-11-13
Supplement: pgen.1007796.s006.pdf [file pgen.1007796.s006.pdf]

| Individual  | sex | Library    | Insert<br>(bp) | GC<br>% | Raw reads      |              |               | Cleaned (and error corrected) |              |               |                        | Accession    |
|-------------|-----|------------|----------------|---------|----------------|--------------|---------------|-------------------------------|--------------|---------------|------------------------|--------------|
|             |     |            |                |         | Length<br>(bp) | Reads<br>(M) | Bases<br>(Gb) | Length<br>(bp)                | Reads<br>(M) | Bases<br>(Gb) | Corr.<br>bases<br>(Mb) |              |
| GC3b_01     | m   | Paired-end | 200            | 28      | 101            | 107.24       | 10.83         | 100.04                        | 107.06       | 10.71         | 2.18                   | SAMN06684244 |
| GC3b_02     | m   | Paired-end | 200            | 28      | 101            | 72.84        | 7.36          | 99.92                         | 72.66        | 7.26          | 1.89                   | SAMN06684245 |
| GC3b_03     | m   | Paired-end | 200            | 28      | 101            | 53.92        | 5.46          | 99.70                         | 53.76        | 5.36          | 1.59                   | SAMN06684246 |
| GC3b_04     | m   | Paired-end | 200            | 28      | 101            | 101.3        | 10.23         | 99.97                         | 101.13       | 10.11         | 2.40                   | SAMN06684247 |
| GC3b_055L10 | f   | Paired-end | 500            | 28      | 100            | 79.46        | 7.95          | 99.17                         | 79.26        | 7.86          | 2.29                   | SAMN06684248 |
| GC3b_055L10 | f   | Paired-end | 800            | 28      | 100            | 61.74        | 6.17          | 99.10                         | 61.54        | 6.10          | 2.44                   | SAMN06684248 |
| GC3b_055L10 | f   | Mate-pair  | 2,000          | 29      | 49             | 112.18       | 5.50          | 47.34                         | 103.26       | 4.89          | 2.57                   | SAMN06684248 |
| GC3b_003    | f   | Mate-pair  | 5,000          | 29      | 49             | 87.14        | 4.27          | 47.24                         | 79.78        | 3.77          | 1.77                   | SAMN06684249 |
| Total       |     |            |                |         |                | 675.82       | 57.77         |                               | 658.45       | 56.06         | 17.13                  |              |
