# Supplementary material for: Evolution at two time frames: Polymorphisms from an ancient singular divergence event fuel contemporary parallel evolution
Source: PubMed Central journal article supplement (PMC6258555; doi:10.1371/journal.pgen.1007796), 2018-11-13
Supplement: pgen.1007796.s007.pdf [file pgen.1007796.s007.pdf]

| <b>Species</b>               | <b>Number</b> |
|------------------------------|---------------|
| <i>Rickettsia sp.</i>        | 106           |
| <i>Wolbachia sp.</i>         | 14            |
| <i>Staphylococcus aureus</i> | 6             |
| <i>Staphylococcus phage</i>  | 6             |
| Other bacterial species      | 6             |
| <b>Total</b>                 | <b>137</b>    |
