# Supplementary material for: Evolution at two time frames: Polymorphisms from an ancient singular divergence event fuel contemporary parallel evolution
Source: PubMed Central journal article supplement (PMC6258555; doi:10.1371/journal.pgen.1007796), 2018-11-13
Supplement: pgen.1007796.s008.pdf [file pgen.1007796.s008.pdf]

| Sample ID          | Taxon                   | Locality         | Sex | Habitat | EL    | EW    | WL    | WW    | Accession    |
|--------------------|-------------------------|------------------|-----|---------|-------|-------|-------|-------|--------------|
| <b>GC3b_026L4</b>  | <i>Pogonus chalceus</i> | France: Guérande | m   | tidal   | 3.717 | 1.100 | 4.662 | 1.300 | SAMN06806679 |
| <b>GC3b_007L10</b> | <i>Pogonus chalceus</i> | France: Guérande | f   | tidal   | 3.339 | 1.325 | 3.160 | 1.450 | SAMN06806680 |
| GC3b_007L10A1      | <i>Pogonus chalceus</i> | France: Guérande | f   | tidal   | 3.245 | 1.150 | 2.800 | 1.200 | SAMN06806681 |
| GC3b_007L10A11     | <i>Pogonus chalceus</i> | France: Guérande | m   | tidal   | 3.465 | 1.150 | 2.980 | 1.300 | SAMN06806682 |
| GC3b_007L10A12     | <i>Pogonus chalceus</i> | France: Guérande | m   | tidal   | 3.276 | 1.125 | 2.898 | 1.300 | SAMN06806683 |
| GC3b_007L10A14     | <i>Pogonus chalceus</i> | France: Guérande | f   | tidal   | 2.898 | 0.875 | 2.680 | 1.025 | SAMN06806684 |
| GC3b_007L10A15     | <i>Pogonus chalceus</i> | France: Guérande | f   | tidal   | 3.591 | 1.300 | 3.040 | 1.375 | SAMN06806685 |
| GC3b_007L10A17     | <i>Pogonus chalceus</i> | France: Guérande | f   | tidal   | 3.843 | 1.250 | 3.080 | 1.375 | SAMN06806686 |
| GC3b_007L10A18     | <i>Pogonus chalceus</i> | France: Guérande | f   | tidal   | 3.213 | 1.200 | 2.960 | 1.075 | SAMN06806687 |
| GC3b_007L10A2      | <i>Pogonus chalceus</i> | France: Guérande | m   | tidal   | 2.993 | 1.100 | 2.760 | 1.200 | SAMN06806688 |
| GC3b_007L10A21     | <i>Pogonus chalceus</i> | France: Guérande | m   | tidal   | 2.961 | 1.025 | 2.680 | 1.225 | SAMN06806689 |
| GC3b_007L10A23     | <i>Pogonus chalceus</i> | France: Guérande | m   | tidal   | 2.835 | 1.000 | NA    | NA    | SAMN06806690 |
| GC3b_007L10A24     | <i>Pogonus chalceus</i> | France: Guérande | m   | tidal   | 2.993 | 1.025 | 2.800 | 1.200 | SAMN06806691 |
| GC3b_007L10A26     | <i>Pogonus chalceus</i> | France: Guérande | f   | tidal   | 3.150 | 1.050 | 2.600 | 1.200 | SAMN06806692 |
| GC3b_007L10A27     | <i>Pogonus chalceus</i> | France: Guérande | f   | tidal   | 3.528 | 1.250 | 2.760 | 1.400 | SAMN06806693 |
| GC3b_007L10A28     | <i>Pogonus chalceus</i> | France: Guérande | f   | tidal   | 3.528 | 1.138 | 2.840 | 1.325 | SAMN06806694 |
| GC3b_007L10A30     | <i>Pogonus chalceus</i> | France: Guérande | m   | tidal   | 3.276 | 1.200 | 2.680 | 1.250 | SAMN06806695 |
| GC3b_007L10A31     | <i>Pogonus chalceus</i> | France: Guérande | m   | tidal   | 3.339 | 1.175 | 2.880 | 1.250 | SAMN06806696 |
| GC3b_007L10A32     | <i>Pogonus chalceus</i> | France: Guérande | f   | tidal   | 3.591 | 1.200 | 2.940 | 1.250 | SAMN06806697 |
| GC3b_007L10A33     | <i>Pogonus chalceus</i> | France: Guérande | f   | tidal   | 3.402 | 1.175 | 2.772 | 1.175 | SAMN06806698 |
| GC3b_007L10A34     | <i>Pogonus chalceus</i> | France: Guérande | m   | tidal   | 3.150 | 1.250 | 2.800 | 1.200 | SAMN06806699 |
| GC3b_007L10A4      | <i>Pogonus chalceus</i> | France: Guérande | f   | tidal   | 3.528 | 1.238 | 2.560 | 1.300 | SAMN06806700 |
| GC3b_007L10A5      | <i>Pogonus chalceus</i> | France: Guérande | f   | tidal   | 3.087 | 1.025 | 2.560 | 1.075 | SAMN06806701 |
| GC3b_007L10A6      | <i>Pogonus chalceus</i> | France: Guérande | m   | tidal   | 3.528 | 1.188 | 3.040 | 1.375 | SAMN06806702 |
| GC3b_007L10A9      | <i>Pogonus chalceus</i> | France: Guérande | m   | tidal   | 3.276 | 1.100 | 2.760 | 1.200 | SAMN06806703 |
| <b>GC3b_053L13</b> | <i>Pogonus chalceus</i> | France: Guérande | m   | tidal   | 3.339 | 1.000 | 2.760 | 1.300 | SAMN06806704 |
| <b>GC3b_026L17</b> | <i>Pogonus chalceus</i> | France: Guérande | f   | tidal   | 3.969 | 1.300 | 3.280 | 1.650 | SAMN06806705 |
| GC3b_026L17A1      | <i>Pogonus chalceus</i> | France: Guérande | f   | tidal   | 3.749 | 1.250 | 3.080 | 1.325 | SAMN06806706 |
| GC3b_026L17A10     | <i>Pogonus chalceus</i> | France: Guérande | f   | tidal   | 3.780 | 1.300 | 2.760 | 1.400 | SAMN06806707 |
| GC3b_026L17A11     | <i>Pogonus chalceus</i> | France: Guérande | m   | tidal   | 3.024 | 1.225 | 2.600 | 1.125 | SAMN06806708 |
| GC3b_026L17A14     | <i>Pogonus chalceus</i> | France: Guérande | f   | tidal   | 4.032 | 1.350 | 2.920 | 1.500 | SAMN06806709 |
| GC3b_026L17A15     | <i>Pogonus chalceus</i> | France: Guérande | f   | tidal   | 3.969 | 1.300 | 3.024 | 1.450 | SAMN06806710 |
| GC3b_026L17A17     | <i>Pogonus chalceus</i> | France: Guérande | f   | tidal   | 3.843 | 1.250 | 3.020 | 1.525 | SAMN06806711 |
| GC3b_026L17A18     | <i>Pogonus chalceus</i> | France: Guérande | m   | tidal   | 3.182 | 1.100 | 2.820 | 1.175 | SAMN06806712 |
| GC3b_026L17A21     | <i>Pogonus chalceus</i> | France: Guérande | f   | tidal   | 3.591 | 1.263 | 2.840 | 1.250 | SAMN06806713 |
| GC3b_026L17A23     | <i>Pogonus chalceus</i> | France: Guérande | m   | tidal   | 3.528 | 1.175 | 2.920 | 1.350 | SAMN06806714 |
| GC3b_026L17A25     | <i>Pogonus chalceus</i> | France: Guérande | f   | tidal   | 3.465 | 1.200 | 2.840 | 1.200 | SAMN06806715 |
| GC3b_026L17A5      | <i>Pogonus chalceus</i> | France: Guérande | f   | tidal   | 3.843 | 1.313 | 3.000 | 1.425 | SAMN06806716 |
| GC3b_026L17A6      | <i>Pogonus chalceus</i> | France: Guérande | m   | tidal   | 3.591 | 1.200 | 3.000 | 1.375 | SAMN06806717 |
| GC3b_026L17A7      | <i>Pogonus chalceus</i> | France: Guérande | m   | tidal   | 3.087 | 1.050 | 2.560 | 1.225 | SAMN06806718 |
| GC3b_026L17A9      | <i>Pogonus chalceus</i> | France: Guérande | m   | tidal   | 3.497 | 1.125 | 2.940 | 1.325 | SAMN06806719 |

|                   |                         |                  |   |       |       |       |       |       |              |
|-------------------|-------------------------|------------------|---|-------|-------|-------|-------|-------|--------------|
| <b>GC3b_026L2</b> | <i>Pogonus chalceus</i> | France: Guérande | m | tidal | 3.591 | 1.125 | 3.240 | 1.450 | SAMN06806720 |
| <b>GP3b_005L1</b> | <i>Pogonus chalceus</i> | France: Guérande | f | tidal | NA    | NA    | NA    | NA    | SAMN06806721 |
| GP3b_005L1A11     | <i>Pogonus chalceus</i> | France: Guérande | f | tidal | 4.064 | 1.325 | 4.158 | 1.900 | SAMN06806722 |
| GP3b_005L1A13     | <i>Pogonus chalceus</i> | France: Guérande | f | tidal | 3.812 | 1.275 | 3.920 | 1.850 | SAMN06806723 |
| GP3b_005L1A15     | <i>Pogonus chalceus</i> | France: Guérande | m | tidal | 3.843 | 1.350 | 2.640 | 1.950 | SAMN06806724 |
| GP3b_005L1A16     | <i>Pogonus chalceus</i> | France: Guérande | m | tidal | 3.560 | 1.175 | 5.859 | 1.800 | SAMN06806725 |
| GP3b_005L1A18     | <i>Pogonus chalceus</i> | France: Guérande | m | tidal | 3.717 | 1.300 | 3.000 | 1.725 | SAMN06806726 |
| GP3b_005L1A19     | <i>Pogonus chalceus</i> | France: Guérande | f | tidal | 4.221 | 1.475 | 3.880 | 2.100 | SAMN06806727 |
| GP3b_005L1A2      | <i>Pogonus chalceus</i> | France: Guérande | f | tidal | 3.528 | 1.188 | 4.347 | 1.675 | SAMN06806728 |
| GP3b_005L1A20     | <i>Pogonus chalceus</i> | France: Guérande | f | tidal | 4.379 | 1.500 | 4.095 | 2.125 | SAMN06806729 |
| GP3b_005L1A21     | <i>Pogonus chalceus</i> | France: Guérande | m | tidal | 3.339 | 1.150 | 4.284 | 1.725 | SAMN06806730 |
| GP3b_005L1A23     | <i>Pogonus chalceus</i> | France: Guérande | f | tidal | 4.095 | 1.400 | 4.347 | 2.025 | SAMN06806731 |
| GP3b_005L1A24     | <i>Pogonus chalceus</i> | France: Guérande | m | tidal | 3.780 | 1.300 | 6.174 | 1.900 | SAMN06806732 |
| GP3b_005L1A26     | <i>Pogonus chalceus</i> | France: Guérande | f | tidal | 4.316 | 1.450 | 4.410 | 2.225 | SAMN06806733 |
| GP3b_005L1A28     | <i>Pogonus chalceus</i> | France: Guérande | f | tidal | 3.969 | 1.375 | 3.920 | 1.950 | SAMN06806734 |
| GP3b_005L1A29     | <i>Pogonus chalceus</i> | France: Guérande | f | tidal | 4.032 | 1.325 | 4.284 | 2.025 | SAMN06806735 |
| GP3b_005L1A3      | <i>Pogonus chalceus</i> | France: Guérande | f | tidal | 4.158 | 1.375 | 3.920 | 2.000 | SAMN06806736 |
| GP3b_005L1A30     | <i>Pogonus chalceus</i> | France: Guérande | f | tidal | 3.780 | 1.450 | 4.788 | 1.900 | SAMN06806737 |
| GP3b_005L1A32     | <i>Pogonus chalceus</i> | France: Guérande | f | tidal | 3.434 | 1.225 | 4.095 | 1.600 | SAMN06806738 |
| GP3b_005L1A33     | <i>Pogonus chalceus</i> | France: Guérande | f | tidal | 4.221 | 1.425 | 3.560 | 2.075 | SAMN06806739 |
| GP3b_005L1A34     | <i>Pogonus chalceus</i> | France: Guérande | f | tidal | 4.001 | 1.275 | 3.680 | 1.900 | SAMN06806740 |
| GP3b_005L1A35     | <i>Pogonus chalceus</i> | France: Guérande | f | tidal | 3.843 | 1.325 | 4.253 | 1.950 | SAMN06806741 |
| GP3b_005L1A6      | <i>Pogonus chalceus</i> | France: Guérande | m | tidal | 3.591 | 1.200 | 6.300 | 1.825 | SAMN06806742 |
| GP3b_005L1A7      | <i>Pogonus chalceus</i> | France: Guérande | f | tidal | 4.032 | 1.375 | 4.040 | 2.025 | SAMN06806743 |
| GP3b_005L1A8      | <i>Pogonus chalceus</i> | France: Guérande | m | tidal | 3.465 | 1.175 | 4.158 | 1.825 | SAMN06806744 |
| <b>GP3b_005L6</b> | <i>Pogonus chalceus</i> | France: Guérande | m | tidal | 3.906 | 1.225 | 5.481 | 1.925 | SAMN06806745 |
| <b>GP3b_031L2</b> | <i>Pogonus chalceus</i> | France: Guérande | f | tidal | 3.969 | 1.325 | 4.221 | 2.000 | SAMN06806746 |
| GP3b_031L2A1      | <i>Pogonus chalceus</i> | France: Guérande | m | tidal | 3.623 | 1.225 | 3.760 | 1.750 | SAMN06806747 |
| GP3b_031L2A10     | <i>Pogonus chalceus</i> | France: Guérande | m | tidal | 3.434 | 1.175 | 2.720 | 1.650 | SAMN06806748 |
| GP3b_031L2A11     | <i>Pogonus chalceus</i> | France: Guérande | f | tidal | 4.064 | 1.375 | 5.418 | 2.000 | SAMN06806749 |
| GP3b_031L2A12     | <i>Pogonus chalceus</i> | France: Guérande | f | tidal | 4.064 | 1.450 | 5.607 | 2.100 | SAMN06806750 |
| GP3b_031L2A18     | <i>Pogonus chalceus</i> | France: Guérande | m | tidal | 3.717 | 1.300 | 5.040 | 2.000 | SAMN06806751 |
| GP3b_031L2A2      | <i>Pogonus chalceus</i> | France: Guérande | f | tidal | 4.158 | 1.500 | 3.720 | 1.950 | SAMN06806752 |
| GP3b_031L2A23     | <i>Pogonus chalceus</i> | France: Guérande | m | tidal | 3.339 | 1.225 | 3.920 | 1.800 | SAMN06806753 |
| GP3b_031L2A3      | <i>Pogonus chalceus</i> | France: Guérande | f | tidal | 4.158 | 1.375 | 4.020 | 2.175 | SAMN06806754 |
| GP3b_031L2A6      | <i>Pogonus chalceus</i> | France: Guérande | f | tidal | 4.095 | 1.425 | 5.229 | 1.850 | SAMN06806755 |
| GP3b_031L2A7      | <i>Pogonus chalceus</i> | France: Guérande | m | tidal | 3.938 | 1.350 | 4.662 | 2.050 | SAMN06806756 |
| GP3b_031L2A8      | <i>Pogonus chalceus</i> | France: Guérande | f | tidal | 4.221 | 1.425 | 5.607 | 2.275 | SAMN06806757 |
| GP3b_031L2A9      | <i>Pogonus chalceus</i> | France: Guérande | m | tidal | 3.654 | 1.250 | 4.095 | 2.025 | SAMN06806758 |
